# Supplementary material
Source: MDPI journal article supplement (https://www.mdpi.com/2075-163X/13/5/628)
Supplement: s1 [file s1]

# Microstructure and Mineral Phase Evolution of Vanadium Slag by Modulating the CaO/V<sub>2</sub>O<sub>5</sub> Ratio

Han Yang, Yan Liu \*, Xingyuan Wan, Ting-an Zhang, Shengnan Lin, Kun Wang and Xiaolong Li

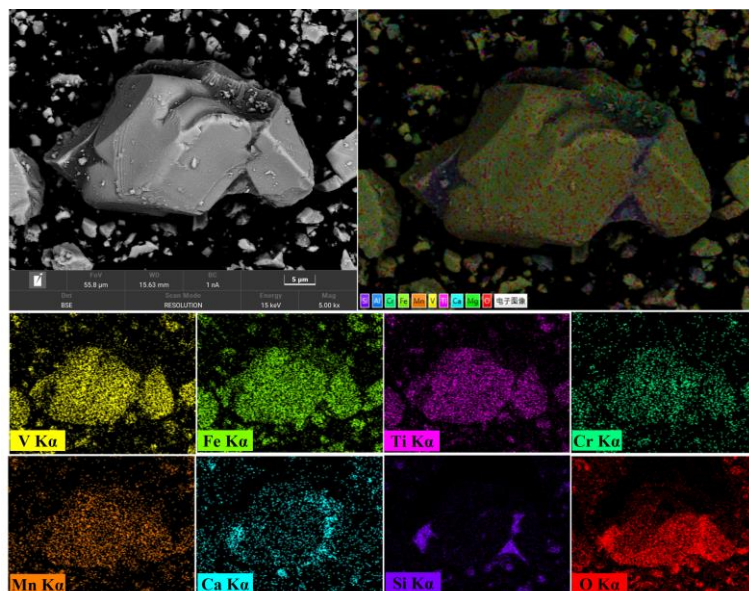

Figure S1. Microphotograph of raw slag and distribution of main elements.

Table S1. Buckingham potential and short-range corrected oxygen-cation pair interaction parameters.

| Pair                                  | A <sub>ij</sub> (eV) | Q <sub>ij</sub> (Å) | C <sub>ij</sub> (eV·Å <sup>6</sup> ) | r <sub>s</sub> (Å) | B <sub>ij</sub> (eV·Å <sup>n</sup> ) | D <sub>ij</sub> (eV/Å <sup>2</sup> ) | n <sub>ij</sub> |
|---------------------------------------|----------------------|---------------------|--------------------------------------|--------------------|--------------------------------------|--------------------------------------|-----------------|
| O <sup>1.2-</sup> -O <sup>1.2-</sup>  | 2029.22              | 0.3436              | 192.58                               | 1.906              | 46.251                               | 3.424                                | -0.328          |
| O <sup>1.2-</sup> -Si <sup>2.4+</sup> | 13702.91             | 0.1938              | 54.681                               | 1.172              | 28.905                               | 3.932                                | -3.057          |
| O <sup>1.2-</sup> -Ca <sup>1.2+</sup> | 7747.183             | 0.2526              | 93.109                               | 1.319              | 74.6787                              | 3.168                                | -3.987          |
| O <sup>1.2-</sup> -Fe <sup>1.2+</sup> | 11777.07             | 0.207132            | 21.642                               | 0.934185           | 103.903                              | 2.67                                 | -32.11          |
| O <sup>1.2-</sup> -V <sup>1.8+</sup>  | 20506.78             | 0.1785              | 7.03                                 | 0.674              | 198.4726                             | 2.3                                  | -212.85         |
| O <sup>1.2-</sup> -V <sup>2.4+</sup>  | 6199.731             | 0.2152              | 25.516                               | 1.093              | 39.879                               | 3.065                                | -5.599          |
| O <sup>1.2-</sup> -V <sup>3+</sup>    | 23300                | 0.1799              | 8.649                                | 0.684              | 225.295                              | 2.314                                | -229.279        |

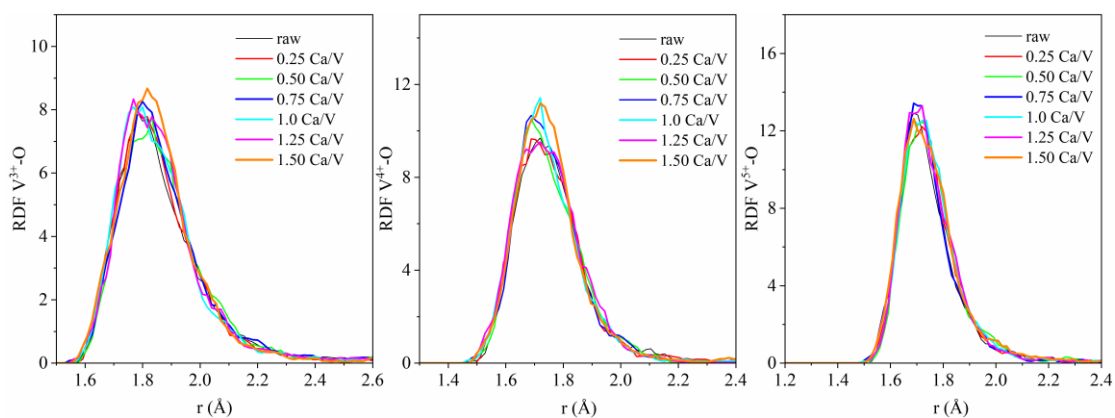

Figure S2. RDF distribution of V-O.

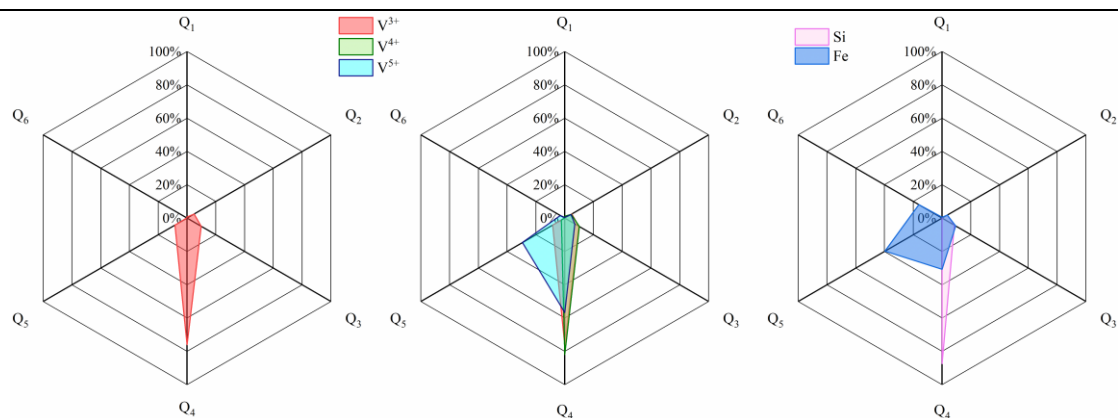

**Figure S3.** Coordination distribution of cations and oxygen.

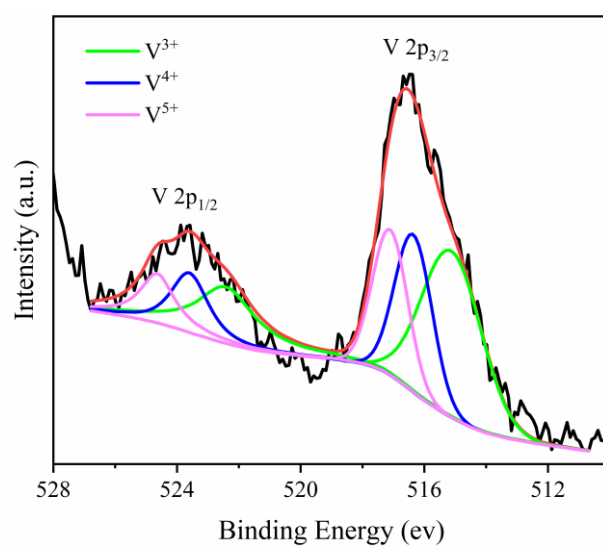

**Figure S4.** V2p XPS fitting curve of 1.5Ca/V.

**Table S2.** Proportions of different valence states of vanadium in modified vanadium slag.

|                 | Raw slag | 0.25  | 0.5   | 0.75  | 1.0   | 1.25  | 1.50  |
|-----------------|----------|-------|-------|-------|-------|-------|-------|
| V <sup>3+</sup> | 37.66    | 38.27 | 38.27 | 36.08 | 43.73 | 43.72 | 41.44 |
| V <sup>4+</sup> | 32.27    | 29.64 | 30.62 | 32.68 | 32.20 | 26.73 | 31.16 |
| V <sup>5+</sup> | 30.08    | 32.09 | 31.11 | 29.24 | 24.07 | 29.54 | 27.39 |

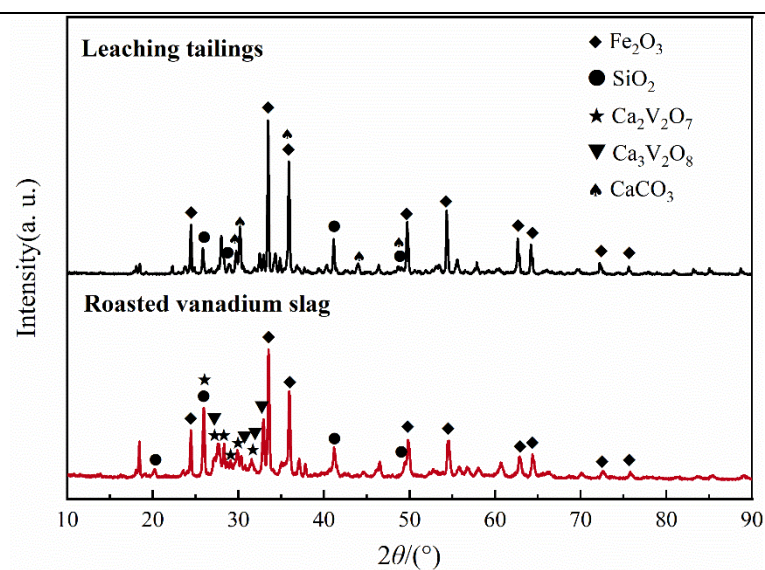

**Figure S5.** Roasted vanadium slag and leaching tailings XRD pattern for 1.0Ca/V (800 °C, 2 h).

**Table S3.** The chemical constituent of roasted clinker and leaching tailings under 1.0Ca/V (800 °C, 2 h) condition (%).

| Constituent           | MgO  | Al <sub>2</sub> O <sub>3</sub> | SiO <sub>2</sub> | P <sub>2</sub> O <sub>5</sub> | CaO  | TiO <sub>2</sub> | V <sub>2</sub> O <sub>5</sub> | Cr <sub>2</sub> O <sub>3</sub> | MnO  | Fe <sub>2</sub> O <sub>3</sub> | CO <sub>2</sub> |
|-----------------------|------|--------------------------------|------------------|-------------------------------|------|------------------|-------------------------------|--------------------------------|------|--------------------------------|-----------------|
| Roasted vanadium slag | 1.79 | 4.63                           | 9.78             | 0.0899                        | 13   | 9.66             | 13.8                          | 1.51                           | 7.13 | 33.8                           | \               |
| Leaching tailings     | 1.74 | 5.49                           | 11.4             | 0.0679                        | 13.3 | 9.33             | 2.27                          | 1.53                           | 6.01 | 34.8                           | 13.1            |
